# Supplementary material for: Inhibition of a transcriptional repressor rescues hearing in a splicing factor–deficient mouse
Source: Life Sci Alliance. 2020 Oct 21;3(12):e202000841. doi: 10.26508/lsa.202000841 (PMC7652395; doi:10.26508/lsa.202000841)
Supplement: Supplementary file 5 [file LSA-2020-00841_TableS2.xlsx]

## Sheet: S1 Table
Table S2. Primers used in this study.
Gene symbol (tested exon if applicable)	Location of exon in GRCm38/mm10 genome assembly	Assay type	Forward primer (5' to 3')	Reverse primer (5' to 3')
Cacna1d (exon 41)	chr14:30,050,234-30,050,260	splicing RT-PCR	CATTACTCCTGCAAGCATGATC	CCGTGTATCTCAGGATCTTCAC
Dtna (exon 12)	chr18:23,600,403-23,600,411	splicing RT-PCR	GCCACTCAACTTGGCTCACATC	GTTCATGCTGGTTACAGGTCTC
Kif1b (exon 10)	chr4:149,265,345-149,265,362	splicing RT-PCR	GTCATTTCGGCCTTGGCAGAG	AGTAAGTACAGAATCCCTATAAGG
Parp6 (exons 19, 20)	chr9:59,641,024-59,641,096 chr9:59,641,741-59,641,810	splicing RT-PCR	ACGGAAGCACCTTTGCTTTCC	TATCTCTGGACCAGCTCATCC
Rest (exon 4)	chr5:77,279,899-77,279,914	splicing RT-PCR	CGACACATGCGGACTCATTC	AGAGGCCACATAATTGCACTG
Actl6b	NA*	qRT-PCR	CCTCCTTACATGATTGCAGCC	GTCTTGGATCACCTCGTTACAC
Chgb	NA*	qRT-PCR	GCAAGTCCTGAAGAAGAGTGG	GCATCGGCTGGGTCTCTTAG
Fgf8	NA*	qRT-PCR	GGGGAAGCTAATTGCCAAGAG	CGCCGTGTAGTTGTTCTCCAG
Heatr3	NA*	qRT-PCR	CACACTTGACACTCTGAAGACC	TCCAGAGCCTCGCCTGTTAC
Lhfpl5	NA*	qRT-PCR	CAGCATTGGAGATGCACTCATC	TGCTTCAGACTTCCTCATTCCC
Loxhd1	NA*	qRT-PCR	GTCCAAGAGCGAAGGTGACAG	TTCTATGACAATCTCGTAGGTGG
Myo6	NA*	qRT-PCR	GTGGTGTTCACTGTCAGTCATC	GCCGTCAATGCGTGGTTTGTG
Ocm	NA*	qRT-PCR	GAGCATCACGGACATTCTGAG	TCAAAGGTGTCTGGGTCTTGG
Scg3	NA*	qRT-PCR	GTGGAAGACGCTGATTCAACC	CCGTCTGGGTCATCTTGAAAC
Scn3b	NA*	qRT-PCR	TGCTACAGAAAGGTCTCTAAGG	GATAGCAAGGTAGTCAGACGC
Snap25	NA*	qRT-PCR	TGAGCTGGAGGAGATGCAGAG	TGCTTTCCAGGGACTCATCAG
Srrm3	NA*	qRT-PCR	TCCAGCAGCTCTGCATCGCC	AGTCTCCTCTTTTTGCGGCTC
Srrm4	NA*	qRT-PCR	CCACCTCCTCTGAAAAAAGGTC	CTTTAGGTCCCGTTCCCTGC
Srrm3	NA*	genotyping Srrm3(gt) allele	CGTACCATGCATGTGGAGGAC	CCAATAAACCCTCTTGCAGTTGC
Srrm3	NA*	genotyping Srrm3(WT) allele	CGTACCATGCATGTGGAGGAC	AGACGTGTTGGGAGAATGACTAG
Srrm4	NA*	genotyping Srrm4(bv) allele	GAAAGAACCACAGCCCCGAGAA	CTGGGCAGGAGGGTACTTCTATAC
Srrm4	NA*	genotyping Srrm4(WT) allele	GGGAAGAGGTGGAGTATGTTG	CCTCGTGCTGGCATAGCTTTC
Tg(DnRest)	NA*	genotyping Tg(DnRest) allele	CATAGACTGAGCTTTAATCAGAAGG	TCCTCCACAAAGAACTTCTTAGC
*NA: not applicable
